# Supplementary material for: RIP3 blockade prevents immune-mediated hepatitis through a myeloid-derived suppressor cell dependent mechanism
Source: PubMed Central journal article supplement (PMC8692153; doi:10.7150/ijbs.65402), 2022-01-01

## Supplementary Material

### Supplementary FIGURE LEGENDS

**Figure S1 | GSK843 induces the accumulation of CD11b<sup>+</sup>Gr-1<sup>+</sup> cells in the liver and spleen of ConA-treated mice.** Mice were pre-treated i.p. with GSK843 (0.5mg/kg; MCE, USA) or vehicle 1 hour before ConA (15 mg/kg) administration; mice were sacrificed 12 hours later after ConA injection and livers and spleen were collected. Representative dot-plots (left) and the histograms (right) show the percentages of CD11b<sup>+</sup>Gr-1<sup>+</sup> cells in HMNCs and spleen cells of mice treated with GSK843+ConA or ConA alone. All the values are shown as mean  $\pm$  SD. ns., not significant; \* $P < 0.05$ , \*\* $P < 0.01$ .

**Figure S2 | The effect of B6-8C5 antibody on Gr-1<sup>+</sup> MDSCs depletion.** Hepatic mononuclear cells (HMNCs) and spleen cells from IgG+GSK872+ConA treated- and aGr1+GSK872+ConA treated-mice were assayed by FACS. (A) Percentages of CD11b<sup>+</sup>Ly6G<sup>hi</sup>Ly6C<sup>lo</sup> cells (PMN-MDSCs) and CD11b<sup>+</sup>Ly6G<sup>lo</sup>Ly6C<sup>hi</sup> (Mo-MDSCs) cells in CD45<sup>+</sup>CD11b<sup>+</sup> cells were analyzed by flow cytometry. The percentages (up) and absolute cell numbers (down) of PMN-MDSCs and Mo-MDSCs in HMNCs (B) and spleen cells (C). All the values are shown as mean  $\pm$  SD. ns., not significant; \* $P < 0.05$ , \*\* $P < 0.01$ .

**Figure S3 | In vivo depletion of Gr1-positive MDSCs aggravates ConA induced liver injury.** Mice were given anti-Gr1 depleting antibody (250 $\mu$ g/ mice) or control IgG (250 $\mu$ g) 36 hours before ConA(15mg/kg) treatment, mice were sacrificed 12 hours after ConA-treatment and blood and liver samples were collected. (A) Percentages of CD11b<sup>+</sup>Gr-1<sup>+</sup>MDSCs and its subtypes (PMN-MDSCs and Mo-MDSCs) cells in livers were analyzed by flow cytometry. (B)The Serum levels of ALT/AST in two groups. (C) Representative photomicrographs (H&E staining; original magnification 200 $\times$ ; scale bars, 50  $\mu$ m) of livers in two groups. All the values are shown as mean  $\pm$  SD. ns., not significant; \* $P < 0.05$ , \*\* $P < 0.01$ .

Figure S1

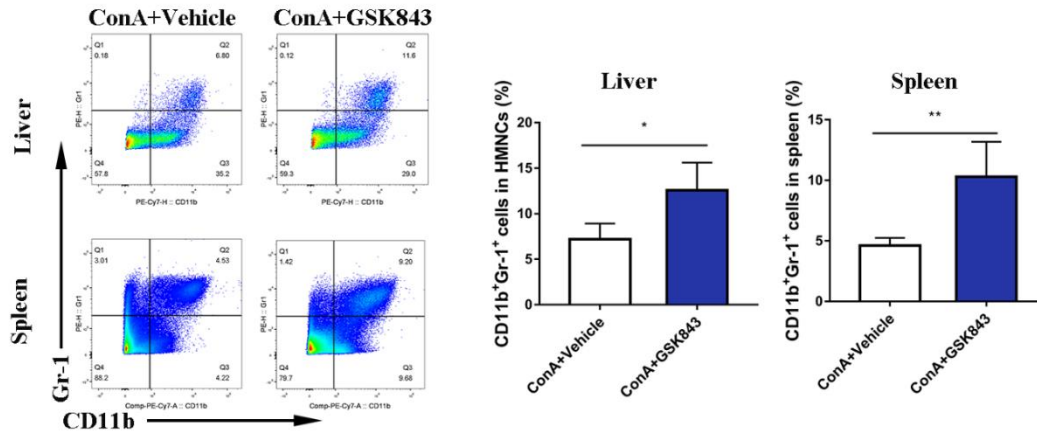

Figure S2

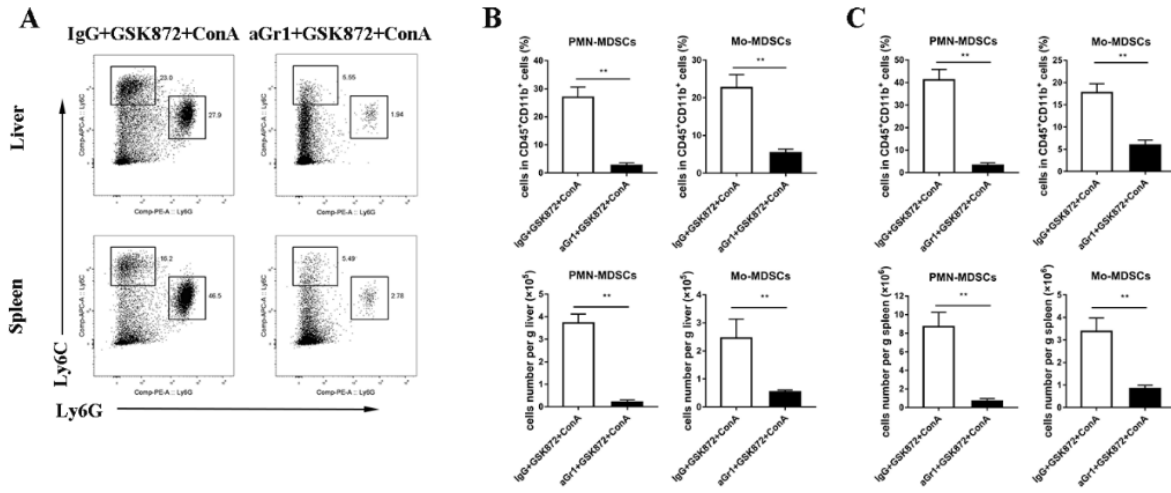

Figure S3

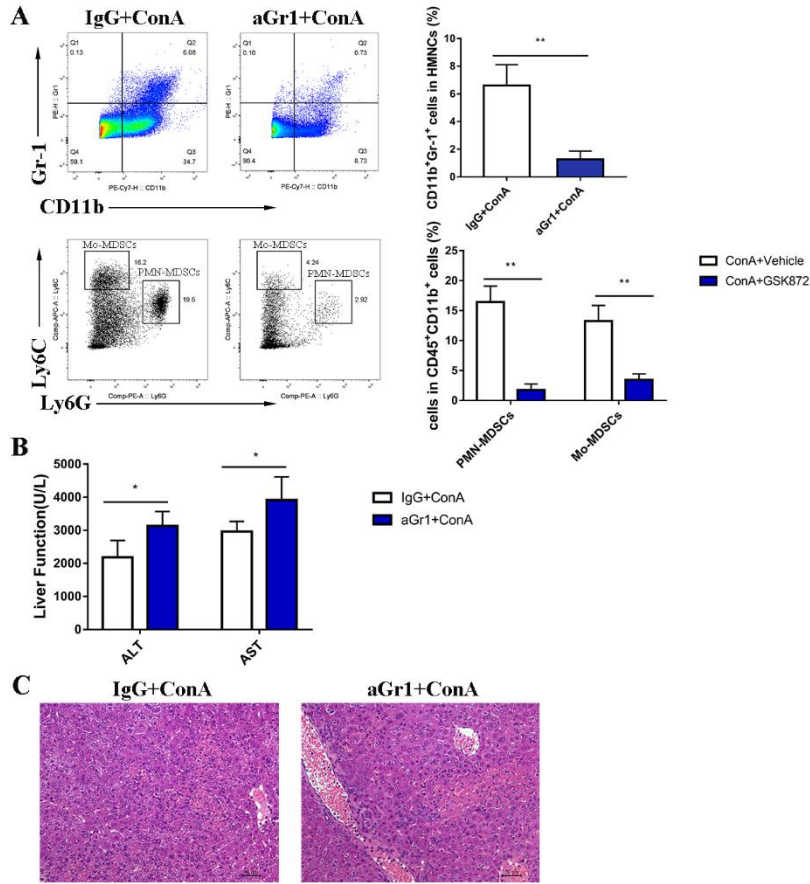

Supplement: ijbsv18p0199s1.pdf [file ijbsv18p0199s1.pdf]
